# Supplementary material for: A simulation–optimization framework for post-disaster allocation of mental health resources
Source: Copernicus journal article supplement (doi:10.5194/nhess-21-3843-2021), 2021-12-21
Supplement: Supplementary file 1 [file nhess-21-3843-2021-supplement.zip]

Archive with 2 entries (2 files):
- nhess-21-3843-2021-supplement-title-page.pdf
- Supplement A_Simulation Optimization Output Example.csv
