# Supplementary material for: A simulation–optimization framework for post-disaster allocation of mental health resources
Source: Copernicus journal article supplement (doi:10.5194/nhess-21-3843-2021), 2021-12-21
Supplement: Supplementary file 1 [file nhess-21-3843-2021-supplement.zip › nhess-21-3843-2021-supplement-title-page.pdf]

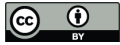

*Supplement of*

**A simulation–optimization framework for post-disaster allocation of mental health resources**

**Stephen Cunningham et al.**

*Correspondence to:* Stephen Cunningham ([scunningham899@gmail.com](mailto:scunningham899@gmail.com))

- [nhess-21-3843-2021-supplement-title-page.pdf](#)
- [Supplement A\\_Simulation Optimization Output Example.csv](#)

The copyright of individual parts of the supplement might differ from the article licence.
