# Supplementary material for: A simulation–optimization framework for post-disaster allocation of mental health resources
Source: Copernicus journal article supplement (doi:10.5194/nhess-21-3843-2021), 2021-12-21
Supplement: Supplementary file 1 [file nhess-21-3843-2021-supplement.zip › Supplement A_Simulation Optimization Output Example.csv]

FIPS	Tract	County	SVI	SocioeconomicStatusSVI	HouseholdCompositionSVI	MinorityStatusSVI	HousingTransportationSVI	Population	MeanIncome	Healthy	Mild	Moderate	Severe	SocialWorkers_Mild_Allocated	SocialWorkers_Moderate_Allocated	Psychologists_Allocated	Mild_Treated	Mild_Untreated	Mild_Excess	Moderate_Treated	Moderate_Untreated	Moderate_Excess	Severe_Treated	Severe_Untreated	Severe_Excess	MHSNoTreatment	MHSTreatment	EconomicLossNoTreatment	EconomicLossTreatment
22071000100	1	Orleans	0.2393	0.2844	0.0507	0.5888	0.4706	3074	37392	2145	372	396	161	0	0	0	0	372	0	0	396	0	0	161	0	13.71920408	13.71920408	$3,115,742.18	$3,115,742.18
22071000200	2	Orleans	0.6753	0.7538	0.2996	0.4174	0.7998	1409	19927	985	184	184	56	0	0	0	0	184	0	0	184	0	0	56	0	7.89469818	7.89469818	$750,063.20	$750,063.20
22071000300	3	Orleans	0.6646	0.8924	0.0871	0.7425	0.621	1285	16864	921	148	155	61	0	0	0	0	148	0	0	155	0	0	61	0	4.276577025	4.276577025	$549,609.31	$549,609.31
22071000400	4	Orleans	0.9537	0.8951	0.9244	0.6847	0.9004	2348	15819	1659	276	289	124	0	17	0	0	276	0	289	0	17	0	124	0	31.15650298	13.66312699	$977,932.75	$506,470.21
22071000601	6.01	Orleans	0.927	0.9991	0.9724	0.5133	0.4698	988	8027	662	138	142	46	0	0	0	0	138	0	0	142	0	0	46	0	3.598635608	3.598635608	$233,018.31	$233,018.31
22071000602	6.02	Orleans	0.7429	0.7876	0.9556	0.7096	0.2536	2828	13930	2006	345	335	142	0	19	0	0	345	0	335	0	7	0	142	0	23.12602876	10.69870826	$1,022,297.89	$558,291.50
22071000603	6.03	Orleans	0.9884	0.9813	0.9644	0.9991	0.5685	1271	9795	928	139	150	54	0	9	0	0	139	0	150	0	12	0	54	0	12.09503727	4.752546763	$300,737.36	$146,188.36
22071000604	6.04	Orleans	0.7482	0.7556	0.6613	0.7931	0.5329	4430	17891	3130	525	555	220	0	31	0	0	525	0	555	0	3	0	220	0	69.40828629	31.41126229	$2,083,982.89	$1,111,648.71
22071000605	6.05	Orleans	0.7002	0.7396	0.6071	0.3712	0.7251	2288	21066	1631	284	267	106	0	15	0	0	284	0	267	0	3	0	106	0	20.9537908	9.629036835	$1,231,174.96	$677,196.87
22071000606	6.06	Orleans	0.3416	0.344	0.2516	0.9272	0.2153	4871	27529	3456	581	608	226	0	34	0	0	581	0	608	0	4	0	226	0	52.44464745	23.18274726	$3,482,852.18	$1,841,927.68
22071000607	6.07	Orleans	0.2215	0.3458	0.4729	0.8872	0.0125	4910	25285	3371	648	624	267	0	35	0	0	648	0	624	0	6	0	267	0	39.50486383	18.60056224	$3,473,234.19	$1,921,739.67
22071000611	6.11	Orleans	0.8381	0.7076	0.5956	0.9973	0.6975	4697	19157	3287	565	588	257	0	33	0	0	565	0	588	0	6	0	257	0	83.10967048	38.89651671	$2,423,811.87	$1,315,503.32
22071000612	6.12	Orleans	0.0925	0.1351	0.2684	0.6057	0.0347	1883	74322	1297	257	229	100	0	0	0	0	257	0	0	229	0	0	100	0	2.403723208	2.403723208	$3,870,384.33	$3,870,384.33
22071000613	6.13	Orleans	0.9938	0.9138	0.992	0.929	0.9368	5102	15249	3528	683	625	266	38	35	14	683	0	1	625	0	5	266	0	14	135.0488493	-2.845333451	$2,135,156.62	($30,431.16)
22071000615	6.15	Orleans	0.5125	0.2898	0.432	0.9298	0.54	4635	23199	3274	579	568	214	0	32	0	0	579	0	568	0	8	0	214	0	67.11692651	29.913813	$2,812,643.58	$1,511,160.61
22071000616	6.16	Orleans	0.637	0.3938	0.7307	0.6563	0.7696	4370	23810	3064	561	515	230	32	29	12	561	0	15	515	0	7	230	0	10	111.6653624	-2.844471306	$2,770,211.96	($67,750.87)
22071000617	6.17	Orleans	0.6432	0.5787	0.1324	0.9059	0.8265	4707	19634	3292	596	584	235	14	33	7	252	344	0	584	0	10	140	95	0	104.4623645	21.4674951	$2,478,588.09	$685,240.05
22071000618	6.18	Orleans	0.0934	0.1458	0.1271	0.8508	0.0294	4404	40370	3144	548	506	206	0	0	0	0	548	0	0	506	0	0	206	0	14.12933261	14.12933261	$4,522,479.67	$4,522,479.67
22071000701	7.01	Orleans	0.7598	0.9511	0.5013	0.7451	0.3585	735	14973	515	99	89	32	0	0	0	0	99	0	0	89	0	0	32	0	2.326998577	2.326998577	$291,518.16	$291,518.16
22071000702	7.02	Orleans	0.5703	0.8587	0.4053	0.4059	0.2963	1765	18911	1259	216	207	83	0	0	0	0	216	0	0	207	0	0	83	0	9.008277359	9.008277359	$852,440.53	$852,440.53
22071000800	8	Orleans	0.6415	0.6124	0.4062	0.7114	0.6699	1593	24911	1115	199	197	82	0	0	0	0	199	0	0	197	0	0	82	0	8.819280965	8.819280965	$1,063,890.80	$1,063,890.80
22071000901	9.01	Orleans	0.6335	0.9644	0.9022	0.3872	0.0516	781	13585	561	80	105	35	0	0	0	0	80	0	0	105	0	0	35	0	1.797158478	1.797158478	$270,211.23	$270,211.23
22071000902	9.02	Orleans	0.4004	0.4391	0.6338	0.516	0.2358	538	14413	375	66	63	34	0	0	0	0	66	0	0	63	0	0	34	0	0.510478475	0.510478475	$210,905.63	$210,905.63
22071000903	9.03	Orleans	0.4938	0.7902	0.7582	0.5142	0.0427	603	16369	407	88	79	29	0	0	0	0	88	0	0	79	0	0	29	0	0.939743171	0.939743171	$284,040.27	$284,040.27
22071000904	9.04	Orleans	0.9644	0.9182	0.8684	0.5071	0.9778	981	12800	688	137	116	40	0	0	0	0	137	0	0	116	0	0	40	0	4.359061813	4.359061813	$330,329.42	$330,329.42
22071001100	11	Orleans	0.2367	0.4009	0.0809	0.214	0.3959	1819	30355	1296	205	222	96	0	0	0	0	205	0	0	222	0	0	96	0	5.41008946	5.41008946	$1,427,637.23	$1,427,637.23
22071001200	12	Orleans	0.1539	0.128	0.0187	0.5835	0.589	1744	40211	1203	225	239	77	0	0	0	0	225	0	0	239	0	0	77	0	2.718448542	2.718448542	$1,940,720.57	$1,940,720.57
22071001301	13.01	Orleans	0.7242	0.7547	0.4747	0.6599	0.6895	1846	20286	1289	217	241	99	0	0	0	0	217	0	0	241	0	0	99	0	11.51084952	11.51084952	$1,016,353.61	$1,016,353.61
22071001302	13.02	Orleans	0.7198	0.9529	0.4089	0.8766	0.2447	1134	12360	811	151	108	64	0	0	0	0	151	0	0	108	0	0	64	0	2.604535616	2.604535616	$352,854.30	$352,854.30
22071001401	14.01	Orleans	0.8292	0.936	0.9867	0.8073	0.1183	1433	12801	1008	188	167	70	0	0	0	0	188	0	0	167	0	0	70	0	6.552796297	6.552796297	$482,873.01	$482,873.01
22071001402	14.02	Orleans	0.573	0.7013	0.7991	0.9591	0.0391	1829	18999	1265	234	242	88	0	0	0	0	234	0	0	242	0	0	88	0	7.205516787	7.205516787	$956,893.74	$956,893.74
22071001500	15	Orleans	0.9413	0.9449	0.8018	0.9121	0.7224	884	15419	616	112	102	54	0	0	0	0	112	0	0	102	0	0	54	0	3.56930302	3.56930302	$369,675.81	$369,675.81
22071001701	17.01	Orleans	0.9199	0.7884	0.9511	0.8401	0.766	2186	14228	1476	281	311	118	0	0	0	0	281	0	0	311	0	0	118	0	13.41068097	13.41068097	$906,736.80	$906,736.80
22071001720	17.2	Orleans	0.8692	0.8436	0.944	0.8899	0.4021	3201	13653	2231	395	416	159	0	24	0	0	395	0	416	0	16	0	159	0	24.77625386	10.61839451	$1,185,331.02	$610,872.63
22071001722	17.22	Orleans	0.8416	0.8498	0.6302	0.5275	0.8852	4140	14029	2885	547	518	190	0	29	0	0	547	0	518	0	4	0	190	0	33.83764972	15.16049382	$1,563,970.22	$850,716.64
22071001723	17.23	Orleans	0.7082	0.7333	0.4418	0.9449	0.4635	4743	17653	3283	587	622	251	0	0	0	0	587	0	0	622	0	0	251	0	28.4235818	28.4235818	$2,310,666.46	$2,310,666.46
22071001724	17.24	Orleans	0.9448	0.8418	0.8818	0.8845	0.8505	4377	15985	3048	535	560	234	30	32	12	535	0	5	560	0	16	234	0	6	124.6376504	-3.094686546	$1,904,805.45	($40,801.17)
22071001725	17.25	Orleans	0.8452	0.8293	0.7787	0.9361	0.5285	7381	15212	5153	963	913	352	0	51	0	0	963	0	913	0	5	0	352	0	78.07810423	35.69152843	$3,014,376.58	$1,654,261.24
22071001730	17.3	Orleans	0.4582	0.6222	0.4436	0.9174	0.0756	951	19167	656	133	108	54	0	0	0	0	133	0	0	108	0	0	54	0	0.129755413	0.129755413	$501,337.83	$501,337.83
22071001734	17.34	Orleans	0.121	0.2676	0.5307	0.0675	0.0774	909	31427	584	136	139	50	0	0	0	0	136	0	0	139	0	0	50	0	0.02430962	0.02430962	$911,206.49	$911,206.49
22071001735	17.35	Orleans	0.6201	0.8036	0.5493	0.5409	0.3443	2013	16663	1352	264	283	114	0	0	0	0	264	0	0	283	0	0	114	0	7.771399405	7.771399405	$988,118.18	$988,118.18
22071001736	17.36	Orleans	0.8034	0.8676	0.3609	0.9334	0.6281	2259	15167	1567	298	271	123	0	0	0	0	298	0	0	271	0	0	123	0	12.49222239	12.49222239	$934,852.33	$934,852.33
22071001737	17.37	Orleans	0.5819	0.7227	0.4818	0.4867	0.4137	3597	14574	2482	485	451	179	0	0	0	0	485	0	0	451	0	0	179	0	12.18824328	12.18824328	$1,444,520.98	$1,444,520.98
22071001739	17.39	Orleans	0.129	0.3796	0.2187	0.5062	0.0133	1862	19854	1298	244	236	84	0	0	0	0	244	0	0	236	0	0	84	0	0.497811849	0.497811849	$995,321.82	$995,321.82
22071001740	17.4	Orleans	0.532	0.4684	0.5058	0.5426	0.5356	4889	18207	3464	553	633	239	0	0	0	0	553	0	0	633	0	0	239	0	14.6223954	14.6223954	$2,333,266.96	$2,333,266.96
22071001741	17.41	Orleans	0.4947	0.7751	0.0578	0.9964	0.1619	1596	15830	1119	210	185	82	0	0	0	0	210	0	0	185	0	0	82	0	0.758021535	0.758021535	$670,799.50	$670,799.50
22071001743	17.43	Orleans	0.7189	0.568	0.7547	0.7389	0.6744	2349	18517	1633	294	316	106	0	0	0	0	294	0	0	316	0	0	106	0	10.79772293	10.79772293	$1,184,651.71	$1,184,651.71
22071001744	17.44	Orleans	0.7998	0.7653	0.5173	0.8277	0.7384	5140	13010	3667	602	584	287	0	0	0	0	602	0	0	584	0	0	287	0	26.54172548	26.54172548	$1,717,539.21	$1,717,539.21
22071001745	17.45	Orleans	0.7776	0.6782	0.5244	0.7735	0.8256	3486	18101	2397	479	409	201	0	0	0	0	479	0	0	409	0	0	201	0	13.65141946	13.65141946	$1,752,551.22	$1,752,551.22
22071001746	17.46	Orleans	0.8185	0.8089	0.5556	0.8819	0.6904	4174	16470	2928	519	504	223	0	0	0	0	519	0	0	504	0	0	223	0	10.30218239	10.30218239	$1,834,193.96	$1,834,193.96
22071001747	17.47	Orleans	0.0996	0.1271	0.064	0.9947	0.0258	4264	34238	2924	561	569	210	0	0	0	0	561	0	0	569	0	0	210	0	2.666063044	2.666063044	$4,093,476.52	$4,093,476.52
22071001748	17.48	Orleans	0.6601	0.5689	0.3938	0.984	0.5222	4631	19779	3163	621	621	226	0	0	0	0	621	0	0	621	0	0	226	0	18.86189908	18.86189908	$2,587,548.39	$2,587,548.39
22071001749	17.49	Orleans	0.8105	0.8391	0.5191	0.9982	0.4128	3090	14476	2164	393	373	160	0	0	0	0	393	0	0	373	0	0	160	0	2.902841356	2.902841356	$1,195,436.01	$1,195,436.01
22071001750	17.5	Orleans	0.8087	0.7244	0.304	1	0.742	3537	15890	2470	455	448	164	0	0	0	0	455	0	0	448	0	0	164	0	6.061177117	6.061177117	$1,509,682.78	$1,509,682.78
22071001800	18	Orleans	0.1094	0.1244	0.0231	0.6075	0.3505	1568	39468	1092	217	186	73	0	0	0	0	217	0	0	186	0	0	73	0	1.400618011	1.400618011	$1,660,964.82	$1,660,964.82
22071001900	19	Orleans	0.8327	0.8658	0.4916	0.9014	0.6779	1238	20935	861	155	163	59	0	0	0	0	155	0	0	163	0	0	59	0	6.353437703	6.353437703	$705,455.01	$705,455.01
22071002000	20	Orleans	0.6272	0.888	0.3867	0.4192	0.4075	1136	15148	767	132	170	67	0	0	0	0	132	0	0	170	0	0	67	0	3.241292138	3.241292138	$506,688.15	$506,688.15
22071002100	21	Orleans	0.5071	0.7236	0.8622	0.5036	0.0534	946	16132	673	120	105	48	0	0	0	0	120	0	0	105	0	0	48	0	1.403836882	1.403836882	$391,391.05	$391,391.05
22071002200	22	Orleans	0.5205	0.7467	0.6862	0.4982	0.1165	1068	15451	751	132	133	52	0	0	0	0	132	0	0	133	0	0	52	0	2.079761586	2.079761586	$437,426.28	$437,426.28
22071002300	23	Orleans	0.9653	0.8284	0.9156	0.9858	0.8345	2025	15904	1406	256	266	97	0	15	0	0	256	0	266	0	4	0	97	0	14.85338884	6.458381391	$879,436.73	$461,205.11
22071002401	24.01	Orleans	0.3452	0.6667	0.3244	0.4156	0.1112	2134	19060	1466	266	290	112	0	0	0	0	266	0	0	290	0	0	112	0	4.114160763	4.114160763	$1,142,252.75	$1,142,252.75
22071002402	24.02	Orleans	0.6308	0.7156	0.6498	0.9245	0.1948	3201	19182	2247	381	404	169	0	0	0	0	381	0	0	404	0	0	169	0	18.85037985	18.85037985	$1,642,142.12	$1,642,142.12
22071002501	25.01	Orleans	0.5249	0.6373	0.664	0.7789	0.1157	2236	18081	1578	275	283	100	0	0	0	0	275	0	0	283	0	0	100	0	4.450290321	4.450290321	$1,061,424.05	$1,061,424.05
22071002502	25.02	Orleans	0.7055	0.6853	0.6773	0.7371	0.5418	2423	18737	1750	275	292	106	0	0	0	0	275	0	0	292	0	0	106	0	6.81441932	6.81441932	$1,127,862.16	$1,127,862.16
22071002503	25.03	Orleans	0.2278	0.3929	0.1173	0.8961	0.0596	2132	25697	1485	265	281	101	0	0	0	0	265	0	0	281	0	0	101	0	2.821685961	2.821685961	$1,486,599.61	$1,486,599.61
22071002504	25.04	Orleans	0.3212	0.5111	0.1164	0.6901	0.2464	2702	24925	1942	316	305	139	0	0	0	0	316	0	0	305	0	0	139	0	5.717742762	5.717742762	$1,693,766.42	$1,693,766.42
22071002600	26	Orleans	0.1948	0.2267	0.2676	0.095	0.427	1561	54143	1081	199	199	82	0	0	0	0	199	0	0	199	0	0	82	0	3.608675815	3.608675815	$2,322,868.20	$2,322,868.20
22071002700	27	Orleans	0.79	0.9698	0.2284	0.8801	0.5036	1557	13352	1053	214	213	77	0	0	0	0	214	0	0	213	0	0	77	0	6.328224196	6.328224196	$599,435.30	$599,435.30
22071002800	28	Orleans	0.7891	0.8622	0.76	0.8757	0.3265	1726	12404	1234	189	216	87	0	0	0	0	189	0	0	216	0	0	87	0	7.520725206	7.520725206	$549,616.14	$549,616.14
22071002900	29	Orleans	0.8007	0.8996	0.6009	0.7691	0.5187	1176	13974	800	166	171	39	0	0	0	0	166	0	0	171	0	0	39	0	3.584265097	3.584265097	$464,863.30	$464,863.30
22071003000	30	Orleans	0.7224	0.9209	0.2471	0.8854	0.4039	999	15066	721	115	112	51	0	0	0	0	115	0	0	112	0	0	51	0	2.272183417	2.272183417	$374,697.61	$374,697.61
22071003100	31	Orleans	0.6005	0.8604	0.7013	0.508	0.1779	1088	14061	766	147	124	51	0	0	0	0	147	0	0	124	0	0	51	0	2.827556195	2.827556195	$400,345.56	$400,345.56
22071003301	33.01	Orleans	0.2509	0.2524	0.1218	0.6794	0.3372	2075	30414	1440	264	257	114	0	0	0	0	264	0	0	257	0	0	114	0	4.029729138	4.029729138	$1,726,536.12	$1,726,536.12
22071003302	33.02	Orleans	0.218	0.2471	0.4231	0.7256	0.0721	3574	33251	2501	476	429	168	0	0	0	0	476	0	0	429	0	0	168	0	7.997654163	7.997654163	$3,164,288.14	$3,164,288.14
22071003303	33.03	Orleans	0.5311	0.7067	0.2916	0.8641	0.1886	2357	18017	1638	267	318	134	0	0	0	0	267	0	0	318	0	0	134	0	6.504554407	6.504554407	$1,170,811.30	$1,170,811.30
22071003304	33.04	Orleans	0.6281	0.736	0.4773	0.8872	0.2829	2397	18421	1683	299	307	108	0	0	0	0	299	0	0	307	0	0	108	0	8.126527467	8.126527467	$1,173,135.08	$1,173,135.08
22071003307	33.07	Orleans	0.5374	0.6116	0.7538	0.5204	0.2251	1647	19628	1135	226	203	83	0	0	0	0	226	0	0	203	0	0	83	0	3.12868913	3.12868913	$892,036.14	$892,036.14
22071003308	33.08	Orleans	0.8923	0.728	0.7822	0.8171	0.8826	3534	17942	2506	436	426	166	0	24	0	0	436	0	426	0	6	0	166	0	38.69009892	17.47158983	$1,643,949.27	$889,028.56
22071003400	34	Orleans	0.4964	0.8169	0.0933	0.3597	0.4733	1236	19393	851	168	158	59	0	0	0	0	168	0	0	158	0	0	59	0	3.637735588	3.637735588	$663,216.69	$663,216.69
22071003500	35	Orleans	0.7696	0.8507	0.6293	0.3881	0.7242	1166	19705	804	155	150	57	0	0	0	0	155	0	0	150	0	0	57	0	4.336625039	4.336625039	$635,024.67	$635,024.67
22071003600	36	Orleans	0.7963	0.8338	0.7182	0.7824	0.5098	1551	16574	1106	172	195	78	0	0	0	0	172	0	0	195	0	0	78	0	6.715136954	6.715136954	$663,802.32	$663,802.32
22071003701	37.01	Orleans	0.3407	0.4622	0.1404	0.349	0.4893	2074	26198	1450	278	254	92	0	0	0	0	278	0	0	254	0	0	92	0	7.300915379	7.300915379	$1,448,455.12	$1,448,455.12
22071003702	37.02	Orleans	0.4653	0.3609	0.6027	0.667	0.4066	3538	31335	2478	449	443	168	0	0	0	0	449	0	0	443	0	0	168	0	22.04538024	22.04538024	$2,960,359.10	$2,960,359.10
22071003800	38	Orleans	0.137	0.024	0.0898	0.4627	0.5009	1211	83817	828	147	168	68	0	0	0	0	147	0	0	168	0	0	68	0	2.924290217	2.924290217	$2,891,445.38	$2,891,445.38
22071004000	40	Orleans	0.7589	0.8267	0.2293	0.6394	0.8772	1935	20915	1384	217	248	86	0	0	0	0	217	0	0	248	0	0	86	0	9.134615484	9.134615484	$1,034,304.05	$1,034,304.05
22071004100	41	Orleans	0.1842	0.072	0.096	0.3384	0.6352	1602	61088	1129	187	216	70	0	0	0	0	187	0	0	216	0	0	70	0	2.00643578	2.00643578	$2,591,227.44	$2,591,227.44
22071004401	44.01	Orleans	0.7687	0.9662	0.6169	0.397	0.4778	1213	13924	847	151	148	67	0	0	0	0	151	0	0	148	0	0	67	0	4.734653841	4.734653841	$456,024.35	$456,024.35
22071004402	44.02	Orleans	0.4386	0.816	0.4409	0.5426	0.0587	158	3710	111	20	16	11	0	0	0	0	20	0	0	16	0	0	11	0	0.005523303	0.005523303	$15,598.77	$15,598.77
22071004500	45	Orleans	0.4698	0.6711	0.1058	0.8037	0.3149	2396	21839	1659	312	287	138	0	0	0	0	312	0	0	287	0	0	138	0	8.709453366	8.709453366	$1,436,895.51	$1,436,895.51
22071004600	46	Orleans	0.0276	0.0613	0.0338	0.079	0.2607	2832	45678	1986	393	324	129	0	0	0	0	393	0	0	324	0	0	129	0	0.783798046	0.783798046	$3,409,218.20	$3,409,218.20
22071004800	48	Orleans	0.9466	1	0.9476	0.5346	0.6512	357	6279	257	37	40	23	0	0	0	0	37	0	0	40	0	0	23	0	2.070374187	2.070374187	$56,903.22	$56,903.22
22071004900	49	Orleans	0.9751	0.9404	0.416	0.9787	0.9813	1287	15942	901	144	168	74	0	10	0	0	144	0	168	0	12	0	74	0	25.21687311	10.80069338	$556,105.00	$276,617.72
22071005000	50	Orleans	0.5587	0.752	0.0098	0.9751	0.7082	1250	20352	876	152	168	54	0	0	0	0	152	0	0	168	0	0	54	0	4.356701393	4.356701393	$680,665.67	$680,665.67
22071005400	54	Orleans	0.2438	0.2818	0.016	0.6563	0.6548	1741	31456	1228	224	216	73	0	0	0	0	224	0	0	216	0	0	73	0	4.151260519	4.151260519	$1,432,441.60	$1,432,441.60
22071005500	55	Orleans	0.0338	0.1022	0.0391	0.4565	0.0703	2914	42898	2054	377	333	150	0	0	0	0	377	0	0	333	0	0	150	0	0.798279472	0.798279472	$3,279,334.67	$3,279,334.67
22071005601	56.01	Orleans	0.0089	0.016	0.0613	0.0542	0.0899	2316	43404	1617	291	298	110	0	0	0	0	291	0	0	298	0	0	110	0	0.189422292	0.189422292	$2,708,605.81	$2,708,605.81
22071005602	56.02	Orleans	0.0044	0.0693	0.0418	0.0346	0.0276	2650	42530	1878	340	324	108	0	0	0	0	340	0	0	324	0	0	108	0	0.083964964	0.083964964	$2,911,498.93	$2,911,498.93
22071005603	56.03	Orleans	0.016	0.0142	0.0471	0.3606	0.0614	1450	44598	1033	184	170	63	0	0	0	0	184	0	0	170	0	0	63	0	0.09802677	0.09802677	$1,649,826.64	$1,649,826.64
22071005604	56.04	Orleans	0.0187	0.0676	0.072	0.0631	0.1014	1627	43478	1150	212	196	69	0	0	0	0	212	0	0	196	0	0	69	0	0.137300363	0.137300363	$1,837,743.59	$1,837,743.59
22071006300	63	Orleans	0.6877	0.8213	0.1751	0.9716	0.4528	1701	23087	1209	215	193	84	0	0	0	0	215	0	0	193	0	0	84	0	6.201033694	6.201033694	$1,009,806.40	$1,009,806.40
22071006400	64	Orleans	0.2758	0.3004	0.0356	0.8925	0.3888	2304	32427	1620	283	272	129	0	0	0	0	283	0	0	272	0	0	129	0	4.781814957	4.781814957	$1,984,798.92	$1,984,798.92
22071006500	65	Orleans	0.3906	0.3493	0.1022	0.8055	0.5792	2709	26546	1929	320	328	132	0	0	0	0	320	0	0	328	0	0	132	0	7.890900912	7.890900912	$1,852,445.34	$1,852,445.34
22071006900	69	Orleans	0.9493	0.9902	0.7404	0.9547	0.6246	775	7690	551	91	98	35	0	0	0	0	91	0	0	98	0	0	35	0	3.426438244	3.426438244	$154,145.52	$154,145.52
22071007200	72	Orleans	0.9929	0.976	0.7378	0.9929	0.9689	2495	10919	1743	298	326	128	0	19	0	0	298	0	326	0	16	0	128	0	29.77368915	12.63126206	$737,095.32	$373,384.93
22071007501	75.01	Orleans	0.6806	0.9049	0.6382	0.9494	0.0934	2683	14911	1865	317	343	158	0	0	0	0	317	0	0	343	0	0	158	0	13.03232099	13.03232099	$1,098,581.20	$1,098,581.20
22071007502	75.02	Orleans	0.8897	0.9218	0.4871	0.9485	0.6868	3168	16401	2235	386	403	144	0	23	0	0	386	0	403	0	11	0	144	0	21.60782144	9.166043864	$1,366,744.76	$705,416.00
22071007604	76.04	Orleans	0.0098	0.0071	0.12	0.3632	0.0089	1818	81335	1263	239	227	89	0	0	0	0	239	0	0	227	0	0	89	0	0.201147273	0.201147273	$4,016,890.53	$4,016,890.53
22071007605	76.05	Orleans	0.9893	0.9689	0.8569	0.944	0.9066	1556	13303	1102	183	197	74	0	0	0	0	183	0	0	197	0	0	74	0	5.552310976	5.552310976	$541,067.63	$541,067.63
22071007606	76.06	Orleans	0.0712	0.0987	0.0773	0.413	0.153	4128	48793	2852	510	544	222	0	0	0	0	510	0	0	544	0	0	222	0	5.592290902	5.592290902	$5,585,582.02	$5,585,582.02
22071007700	77	Orleans	0.1272	0.1582	0.0044	0.4849	0.5827	2454	55473	1717	295	307	135	0	18	0	0	295	0	307	0	17	0	135	0	16.20206614	7.215446915	$3,669,174.20	$1,918,628.69
22071007800	78	Orleans	0.1806	0.2578	0.0542	0.73	0.2037	1111	50419	769	165	134	43	0	0	0	0	165	0	0	134	0	0	43	0	1.599206394	1.599206394	$1,512,362.80	$1,512,362.80
22071008200	82	Orleans	0.2171	0.0916	0.0684	0.7496	0.532	1571	62609	1078	205	208	80	0	0	0	0	205	0	0	208	0	0	80	0	4.04442784	4.04442784	$2,756,708.58	$2,756,708.58
22071008300	83	Orleans	0.1157	0.1973	0.0276	0.2842	0.371	1185	58194	820	157	154	54	0	0	0	0	157	0	0	154	0	0	54	0	0.981647563	0.981647563	$1,889,048.99	$1,889,048.99
22071008400	84	Orleans	0.4021	0.3236	0.112	0.8677	0.5783	1126	30673	826	115	141	44	0	0	0	0	115	0	0	141	0	0	44	0	4.43397042	4.43397042	$827,515.52	$827,515.52
22071008500	85	Orleans	0.9342	0.9911	0.3822	0.9805	0.7402	1328	9826	895	193	176	64	0	0	0	0	193	0	0	176	0	0	64	0	6.441274727	6.441274727	$376,967.09	$376,967.09
22071008600	86	Orleans	0.8968	0.9831	0.1467	0.992	0.7838	895	12176	646	96	112	41	0	0	0	0	96	0	0	112	0	0	41	0	2.992399077	2.992399077	$272,774.09	$272,774.09
22071008800	88	Orleans	0.0231	0.1938	0.0071	0.1128	0.1824	1775	40443	1209	251	211	104	0	0	0	0	251	0	0	211	0	0	104	0	0.279561171	0.279561171	$2,033,307.84	$2,033,307.84
22071009000	90	Orleans	0.0961	0.0702	0.0818	0.1998	0.387	2080	91378	1459	252	254	115	0	0	0	0	252	0	0	254	0	0	115	0	2.721380074	2.721380074	$5,086,612.70	$5,086,612.70
22071009100	91	Orleans	0.3425	0.3084	0.0284	0.7487	0.7785	1663	36690	1150	216	223	74	0	0	0	0	216	0	0	223	0	0	74	0	6.209702437	6.209702437	$1,677,240.63	$1,677,240.63
22071009200	92	Orleans	0.9137	0.9591	0.5876	0.9645	0.6406	1443	14981	999	189	184	71	0	0	0	0	189	0	0	184	0	0	71	0	7.342619007	7.342619007	$592,582.69	$592,582.69
22071009400	94	Orleans	0.9911	0.9947	0.8978	0.9902	0.782	1379	7758	985	154	166	74	0	10	0	0	154	0	166	0	14	0	74	0	9.184973799	3.948291904	$275,009.41	$138,999.98
22071009600	96	Orleans	0.3087	0.3262	0.0213	0.8384	0.6139	1470	41749	1035	178	177	80	0	0	0	0	178	0	0	177	0	0	80	0	2.727474257	2.727474257	$1,626,478.13	$1,626,478.13
22071009700	97	Orleans	0.1744	0.2773	0.0631	0.8739	0.0943	1464	43626	1035	193	155	81	0	0	0	0	193	0	0	155	0	0	81	0	1.783197837	1.783197837	$1,660,339.82	$1,660,339.82
22071010000	100	Orleans	0.5187	0.5627	0.1307	0.7469	0.5765	1560	24392	1085	194	204	77	0	0	0	0	194	0	0	204	0	0	77	0	5.9563612	5.9563612	$1,036,603.20	$1,036,603.20
22071010100	101	Orleans	0.0489	0.1422	0.0347	0.1199	0.2794	1829	46900	1321	226	187	95	0	0	0	0	226	0	0	187	0	0	95	0	0.84959328	0.84959328	$2,115,973.81	$2,115,973.81
22071010200	102	Orleans	0.4244	0.5013	0.0951	0.3766	0.7322	1947	20581	1370	232	263	82	0	0	0	0	232	0	0	263	0	0	82	0	4.878743071	4.878743071	$1,062,901.52	$1,062,901.52
22071010300	103	Orleans	0.8265	0.8382	0.5796	0.7513	0.7393	3357	19578	2347	438	413	159	0	23	0	0	438	0	413	0	1	0	159	0	21.92560165	10.06441188	$1,758,013.21	$968,579.98
22071010600	106	Orleans	0.177	0.1902	0.1529	0.1519	0.4324	1335	44717	944	175	145	71	0	0	0	0	175	0	0	145	0	0	71	0	1.248100315	1.248100315	$1,551,355.24	$1,551,355.24
22071010700	107	Orleans	0.1343	0.1298	0.0453	0.4663	0.395	1977	62373	1368	251	251	107	0	0	0	0	251	0	0	251	0	0	107	0	2.937376475	2.937376475	$3,398,004.14	$3,398,004.14
22071010800	108	Orleans	0.0009	0	0.0222	0.2069	0.0062	1424	87598	998	166	190	70	0	0	0	0	166	0	0	190	0	0	70	0	0.010762673	0.010762673	$3,354,043.42	$3,354,043.42
22071010900	109	Orleans	0.0525	0.1342	0.0764	0.2043	0.1352	3145	53062	2239	401	348	157	0	0	0	0	401	0	0	348	0	0	157	0	2.148759946	2.148759946	$4,268,670.72	$4,268,670.72
22071011100	111	Orleans	0.5534	0.4542	0.6053	0.7078	0.5205	1644	35541	1173	203	191	77	0	0	0	0	203	0	0	191	0	0	77	0	6.736052359	6.736052359	$1,489,727.79	$1,489,727.79
22071011200	112	Orleans	0.0863	0.2151	0.1342	0.1909	0.121	1633	32717	1183	203	184	63	0	0	0	0	203	0	0	184	0	0	63	0	0.830236576	0.830236576	$1,302,181.42	$1,302,181.42
22071011400	114	Orleans	0.0178	0.0258	0.0311	0.4787	0.0658	1993	53740	1382	266	242	103	0	0	0	0	266	0	0	242	0	0	103	0	0.404729096	0.404729096	$2,919,870.88	$2,919,870.88
22071011600	116	Orleans	0.0383	0.0169	0.1262	0.0613	0.3069	1561	93099	1066	219	196	80	0	0	0	0	219	0	0	196	0	0	80	0	0.56010937	0.56010937	$4,089,481.98	$4,089,481.98
22071011700	117	Orleans	0.0623	0.0187	0.0551	0.2167	0.3639	2960	111631	2060	371	354	175	0	0	0	0	371	0	0	354	0	0	175	0	3.932438769	3.932438769	$8,996,602.25	$8,996,602.25
22071011900	119	Orleans	0.0302	0.1653	0.0053	0.302	0.1566	1687	45583	1183	203	222	79	0	0	0	0	203	0	0	222	0	0	79	0	0.424949286	0.424949286	$2,057,604.13	$2,057,604.13
22071012200	122	Orleans	0.0027	0.0578	0.008	0.0844	0.0836	2268	50869	1570	315	284	99	0	0	0	0	315	0	0	284	0	0	99	0	0.064638307	0.064638307	$3,140,652.06	$3,140,652.06
22071012300	123	Orleans	0.145	0.2489	0.088	0.9227	0.0356	2093	31091	1449	269	273	102	0	0	0	0	269	0	0	273	0	0	102	0	2.404514955	2.404514955	$1,787,059.57	$1,787,059.57
22071012400	124	Orleans	0.089	0.2782	0.0382	0.2158	0.1833	1366	38711	954	180	161	71	0	0	0	0	180	0	0	161	0	0	71	0	0.823407926	0.823407926	$1,418,031.66	$1,418,031.66
22071012500	125	Orleans	0.3559	0.2089	0.0836	0.6687	0.8114	1657	38606	1176	212	184	85	0	0	0	0	212	0	0	184	0	0	85	0	6.456491796	6.456491796	$1,649,898.80	$1,649,898.80
22071012600	126	Orleans	0.0454	0.1369	0.0062	0.4609	0.274	1725	51179	1222	199	220	84	0	0	0	0	199	0	0	220	0	0	84	0	0.572864693	0.572864693	$2,310,858.04	$2,310,858.04
22071012700	127	Orleans	0.0774	0.2551	0.0196	0.7105	0.0783	2236	36917	1580	278	279	99	0	0	0	0	278	0	0	279	0	0	99	0	1.396131041	1.396131041	$2,157,429.48	$2,157,429.48
22071012800	128	Orleans	0.2874	0.2071	0.0293	0.7345	0.7375	2285	40401	1590	297	285	113	0	0	0	0	297	0	0	285	0	0	113	0	6.366585688	6.366585688	$2,500,882.78	$2,500,882.78
22071012900	129	Orleans	0.4911	0.4471	0.5413	0.2096	0.6726	1623	31836	1130	214	195	84	0	0	0	0	214	0	0	195	0	0	84	0	6.920330399	6.920330399	$1,396,261.54	$1,396,261.54
22071013000	130	Orleans	0.4849	0.5751	0.1129	0.7638	0.4929	1706	28709	1207	188	226	85	0	0	0	0	188	0	0	226	0	0	85	0	3.847356056	3.847356056	$1,291,987.59	$1,291,987.59
22071013100	131	Orleans	0.7642	0.9636	0.6222	0.4423	0.4333	1457	13886	1038	172	174	73	0	0	0	0	172	0	0	174	0	0	73	0	4.25952431	4.25952431	$520,639.40	$520,639.40
22071013200	132	Orleans	0.4297	0.6391	0.4907	0.8917	0.0365	2416	25649	1715	296	288	117	0	0	0	0	296	0	0	288	0	0	117	0	8.419804832	8.419804832	$1,603,754.67	$1,603,754.67
22071013301	133.01	Orleans	0.0169	0.0036	0.1111	0.1474	0.0916	3872	62194	2729	484	467	192	0	0	0	0	484	0	0	467	0	0	192	0	2.041107357	2.041107357	$6,339,366.26	$6,339,366.26
22071013302	133.02	Orleans	0.0916	0.0338	0.0702	0.5755	0.2642	2098	54952	1472	286	236	104	0	0	0	0	286	0	0	236	0	0	104	0	3.213898947	3.213898947	$3,042,790.10	$3,042,790.10
22071013400	134	Orleans	0.4609	0.2044	0.2062	0.5773	0.9395	2634	64657	1839	354	301	140	20	17	7	354	0	6	301	0	5	140	0	0	194.26935	-2.16623	$4,561,958.78	($60,981.29)
22071013500	135	Orleans	0.363	0.2756	0.0587	0.5044	0.8923	2120	84562	1483	251	274	112	0	16	0	0	251	0	274	0	14	0	112	0	44.71512199	19.25023896	$4,839,529.60	$2,467,530.74
22071013600	136	Orleans	0.0827	0.4249	0.0427	0.2389	0.0436	880	27118	625	102	106	47	0	0	0	0	102	0	0	106	0	0	47	0	0.3126899	0.3126899	$620,686.44	$620,686.44
22071013700	137	Orleans	0.831	0.9769	0.8338	0.7558	0.2678	2635	8738	1839	336	341	119	0	19	0	0	336	0	341	0	1	0	119	0	26.60567509	11.61532767	$619,828.23	$328,766.65
22071013800	138	Orleans	0.9502	0.9111	0.8462	0.7904	0.8781	2518	12407	1769	286	315	148	0	0	0	0	286	0	0	315	0	0	148	0	11.87673414	11.87673414	$838,323.99	$838,323.99
22071013900	139	Orleans	0.3568	0.4196	0.0124	0.7131	0.7936	1786	44893	1237	243	225	81	0	13	0	0	243	0	225	0	9	0	81	0	11.32353419	4.863085217	$2,185,286.69	$1,162,132.18
22071014000	140	Orleans	0.9982	0.9973	0.9929	0.9956	0.8399	1744	10160	1216	224	214	90	0	12	0	0	224	0	214	0	2	0	90	0	21.54668239	10.09953419	$478,360.64	$264,616.50
22071014100	141	Orleans	0.516	0.5618	0.1769	0.2993	0.7802	2068	20462	1453	259	273	83	0	0	0	0	259	0	0	273	0	0	83	0	12.34442617	12.34442617	$1,120,782.22	$1,120,782.22
22071014200	142	Orleans	0.0365	0.152	0.0178	0.4023	0.1272	1745	38763	1251	233	178	83	0	0	0	0	233	0	0	178	0	0	83	0	0.655839695	0.655839695	$1,687,910.94	$1,687,910.94
22071014300	143	Orleans	0.9991	0.9956	0.9609	0.9885	0.9822	2179	8715	1478	302	277	122	0	0	0	0	302	0	0	277	0	0	122	0	12.05093871	12.05093871	$544,020.15	$544,020.15
22071014400	144	Orleans	0.1148	0.2542	0.0747	0.2131	0.1895	1565	31435	1086	191	207	81	0	0	0	0	191	0	0	207	0	0	81	0	2.572672525	2.572672525	$1,350,796.40	$1,350,796.40
22071001702	17.02	Orleans	0.7233	0.7191	0.2436	0.9325	0.6984	3170	16081	2173	411	416	170	0	24	0	0	411	0	416	0	16	0	170	0	21.70122028	9.624575059	$1,433,788.57	$757,170.58
22071001751	17.51	Orleans	1	0.9982	1	0.9849	1	984	8930	675	128	129	52	0	0	0	0	128	0	0	129	0	0	52	0	3.497910912	3.497910912	$246,618.46	$246,618.46
22071003900	39	Orleans	0.4564	0.5831	0.0089	0.8721	0.7625	1203	26383	840	155	143	65	0	0	0	0	155	0	0	143	0	0	65	0	4.020148877	4.020148877	$853,844.23	$853,844.23
22071006000	60	Orleans	0.8479	0.7742	0.0604	0.9529	0.9964	2204	12542	1552	279	266	107	0	15	0	0	279	0	266	0	4	0	107	0	22.77964877	10.44339198	$728,295.04	$398,474.80
22071007000	70	Orleans	0.6459	0.8009	0.0169	0.8996	0.863	1726	5032	1206	196	224	100	0	0	0	0	196	0	0	224	0	0	100	0	8.898358547	8.898358547	$236,258.60	$236,258.60
22071007101	71.01	Orleans	0.8043	0.7929	0.1707	0.9645	0.855	2554	18373	1761	326	339	128	0	19	0	0	326	0	339	0	3	0	128	0	23.46238102	10.41500816	$1,302,658.28	$690,656.17
22071009900	99	Orleans	0.2402	0.0596	0.2329	0.5719	0.5747	2916	52816	2039	347	379	151	0	22	0	0	347	0	379	0	17	0	151	0	23.54879527	10.108964	$4,159,086.36	$2,122,009.41
22071011500	115	Orleans	0.0988	0.0053	0.0889	0.4742	0.3843	1305	65910	926	157	158	64	0	0	0	0	157	0	0	158	0	0	64	0	1.038885389	1.038885389	$2,232,642.56	$2,232,642.56
22071012000	120	Orleans	0.0703	0.032	0.1209	0.087	0.403	1470	72292	1047	156	185	82	0	0	0	0	156	0	0	185	0	0	82	0	1.564670188	1.564670188	$2,766,595.03	$2,766,595.03
22071012101	121.01	Orleans	0.2037	0.3022	0.0249	0.5782	0.4351	3334	24681	2325	399	437	173	0	0	0	0	399	0	0	437	0	0	173	0	7.240931462	7.240931462	$2,236,108.74	$2,236,108.74
22071012102	121.02	Orleans	0.3674	0.6444	0.0018	0.5622	0.75	4163	12026	2913	502	540	208	0	0	0	0	502	0	0	540	0	0	208	0	17.96518599	17.96518599	$1,347,449.05	$1,347,449.05
